# Supplementary material for: Anti-tumor activity of splice-switching oligonucleotides
Source: PubMed Central journal article supplement — Nucleic Acids Res. 2010 Aug 18;38(22):8348–56. doi: 10.1093/nar/gkq731 (PMC3001088; doi:10.1093/nar/gkq731), 2010-08-18
Supplement: supp_gkq731_Supplemental_Figures_FINAL.pdf [file supp_gkq731_Supplemental_Figures_FINAL.pdf]

Supplementary Data for NAR-00971-C-2009:

## **Anti-tumor activity of splice-switching oligonucleotides**

\*John A. Bauman<sup>1</sup>, \*Shyh-Dar Li<sup>2</sup>, Angela Yang<sup>2</sup>, Leaf Huang<sup>2</sup> and Ryszard Kole<sup>1,3</sup>

\*These authors contributed equally to this work <sup>1</sup>Department of Pharmacology and Lineberger Comprehensive Cancer Center, University of North Carolina, Chapel Hill, North Carolina, USA; <sup>2</sup>Division of Molecular Pharmaceutics, School of Pharmacy, University of North Carolina, Chapel Hill, North Carolina, USA. <sup>3</sup>AVI BioPharma, Inc., Corvallis, OR, USA

Editorial correspondence should be addressed to:

John A. Bauman  
Campus Box 7365  
1072 Genetic Medicine Building  
120 Mason Farm Road, Chapel Hill, NC 27599-7365  
e-mail: john\_bauman@med.unc.edu  
Phone: 919-966-4343 // Fax: 919-966-5640

Contents:

Supplementary Methods

Supplementary Figure S1. Bcl-x<sub>S</sub> detection by RT-PCR and Western Blot

Supplementary Figure S2. Bcl-x SSO does not affect Mcl-1 alternative pre-mRNA splicing

Supplementary Figure S3. Increasing the number of doses of the Bcl-x SSO NP formulation results in increased Bcl-x splice-switching.

Supplementary Figure S4. Systemically-delivered free Bcl-x SSO has no effect on Bcl-x pre-mRNA splicing in tumor xenografts.

## **SUPPLEMENTARY METHODS**

**Detection of Bcl-x<sub>S</sub> levels.** B16F10 cells were plated at  $2.0 \times 10^5$  cells/plate in 60 mm<sup>2</sup> plates. Cells were transfected with 4 ug Bcl-x<sub>S</sub> plasmid DNA (pcDNA3.1-Bcl-x<sub>S</sub> graciously provided by Dr. Reuven Stein, Tel Aviv University, Tel Aviv, Israel) using LipoFectamine 2000 according to the manufacturer's protocol. Approximately 24 hours later, the transfected cells were rinsed twice with PBS and suspended using Trypsin-EDTA. B16F10 cells transfected with pcDNA3.1-Bcl-x<sub>S</sub> were then diluted in un-transfected B16F10 cells at various ratios: 1:2, 1:5, 1:10, 1:25, 1:50 and 1:100. Cells were then subjected to RNA and protein isolation and analysis as described in the Methods section of the paper.

**Preliminary Animal Studies.** Preliminary animal experiments were carried out as described in the Methods section of the paper, except with a different dosing schedule. Seven days after tumor inoculation, tumor-bearing mice were injected i.v. with NP formulated with Bcl-x SSO at 2.4 mg/kg either (a) everyday for a total of 9 injections, or (b) every other day for a total of 5 injections. The negative control group received no treatment. Animals were euthanized one day following the final injection (day 16 after tumor inoculation). RNA was isolated from tumor nodules and analyzed by RT-PCR as described in the Methods section of the paper.

**SUPPLEMENTARY FIGURES:**

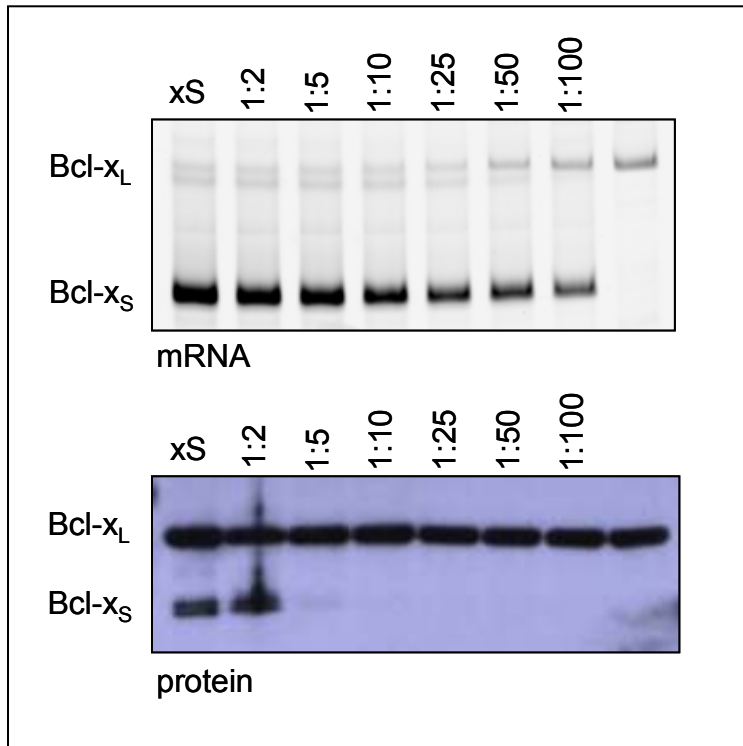

**Figure S1. Bcl-x<sub>S</sub> detection by RT-PCR and Western Blot.** B16F10 cells transfected with pcDNA3.1-Bcl-x<sub>S</sub> were diluted with untransfected cells at various ratios (undiluted, 1:2, 1:5, 1:10, 1:25, 1:50, 1:100). RNA and protein were isolated and analyzed by RT-PCR and Western Blot, respectively. Bcl-x<sub>S</sub> mRNA was readily detected even at the 1:100 dilution, though it was not detected in untransfected cells. Bcl-x<sub>S</sub> protein could be detected up to the 1:5 dilution, but was not seen in more dilute samples. The level of Bcl-x<sub>S</sub> mRNA corresponding to the 1:5 dilution is greater than can be achieved endogenously through alternative splicing.

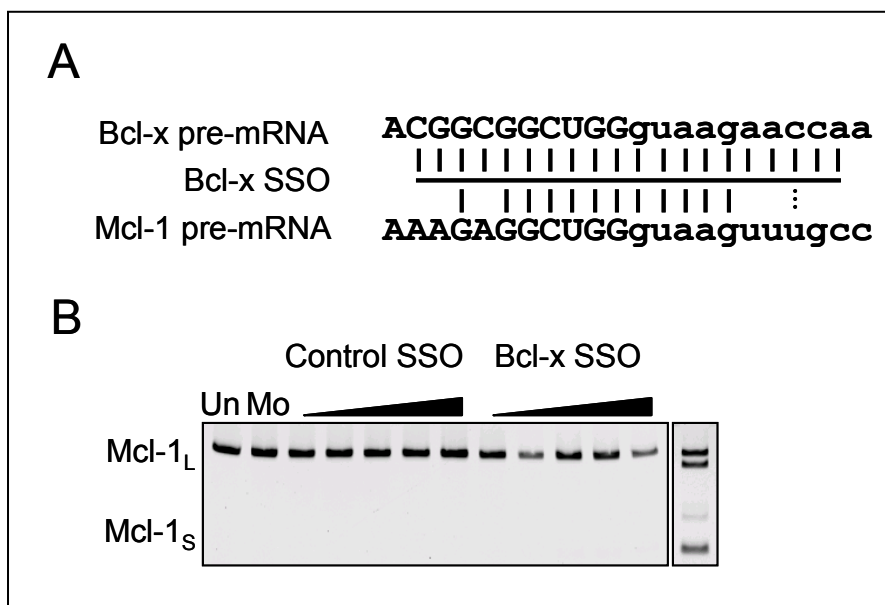

**Figure S2. Bcl-x SSO does not affect Mcl-1 alternative pre-mRNA splicing.** (A) The Bcl-x and Mcl-1 share a high degree of sequence conservation at the 5' splice site of exon 2. As a result the Bcl-x SSO matches 13 out of 20 bases in Mcl-1 pre-mRNA (including one G-U pair). (B) RNA from Bcl-x SSO-transfected B16F10 cells was subjected to RT-PCR using primers flanking exon 2 of mouse Mcl-1. Mcl-1 pre-mRNA can be alternatively spliced to produce a transcript that lacks exon 2. However, the Bcl-x SSO fails to redirect Mcl-1 splicing, despite matching 13 out of 20 bases in Mcl-1. SSO concentrations used were 4, 11, 33, 100 and 300nM.

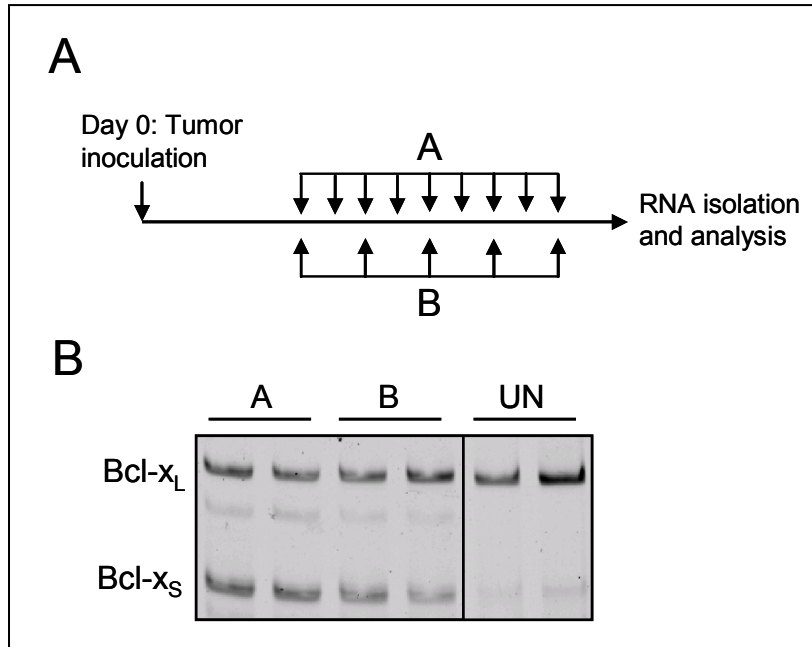

**Figure S3. Increasing the number of doses of the Bcl-x SSO NP formulation results in increased Bcl-x splice-switching.** (A) Bcl-x SSO NP was systemically delivered (tail-vein injection) every day (9 injections, group A) or every over day (5 injections, group B) to mice bearing B16F10 tumors. (B) RT-PCR analysis of Bcl-x pre-mRNA isolated from lung tumor nodules from mice injected with 2.4 mg/kg NP formulated with Bcl-x SSO every day (9 injections, group A) or every over day (5 injections, group B) revealed robust Bcl-x splice-switching.

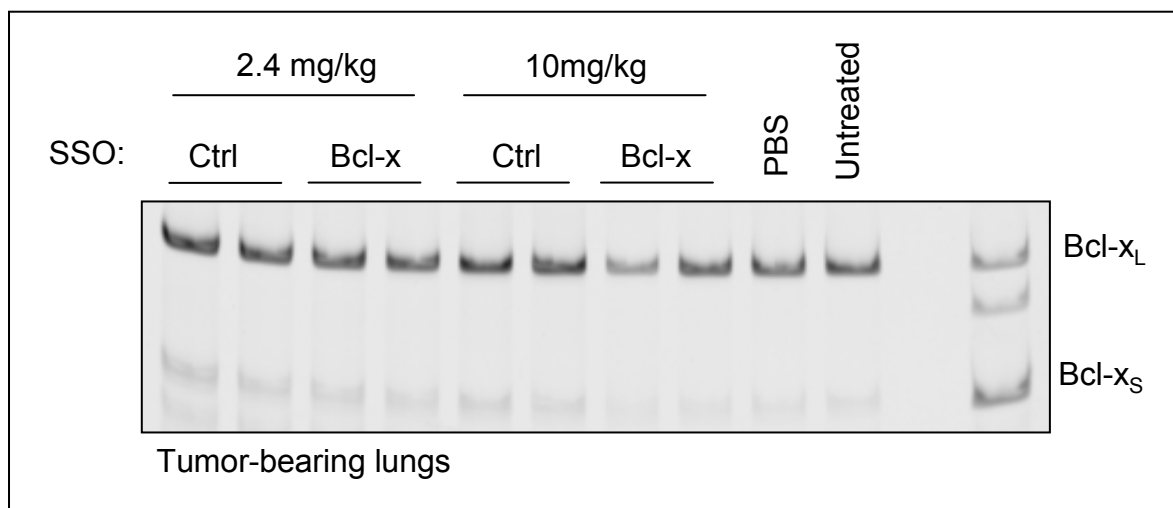

**Figure S4. Systemically-delivered free Bcl-x SSO has no effect on Bcl-x pre-mRNA splicing in tumor xenografts.** Tumor-bearing animals were injected with vehicle only (PBS) or with free SSO (control SSO or Bcl-x SSO) in PBS at 2.4 or 10 mg/kg on days 3-6 following tumor inoculation. On day 7 animals were euthanized and RNA from tumor-bearing lungs was isolated and analyzed by RT-PCR.
